# Supplementary material for: Cognitive, Behavioral, and Sensory Profile of Pallister–Killian Syndrome: A Prospective Study of 22 Individuals
Source: MDPI journal article supplement (doi:10.3390/genes13020356), 2022-02-16
Supplement: s1 [file s1]

**Table S1. Characterization of Repetitive Behaviors through Direct Video Analysis**

| Patient number | RH | R | G | B | PL | RCE | ER | JHW | JHC | M  | SHM | HP | P | HBN | C | TF | F | S | HG | T | MHM | RFM | CAM | HBH | HT | OBS | EPP |
|----------------|----|---|---|---|----|-----|----|-----|-----|----|-----|----|---|-----|---|----|---|---|----|---|-----|-----|-----|-----|----|-----|-----|
| n°1            | 0  | 0 | 1 | 0 | 1  | 0   | 0  | 1   | 0   | 0  | 1   | 0  | 0 | 0   | 1 | 0  | 1 | 1 | 1  | 0 | 0   | 1   | 1   | 0   | 0  | 1   | 0   |
| n°2            | 0  | 0 | 0 | 0 | 0  | 0   | 0  | 0   | 1   | 0  | 0   | 0  | 0 | 0   | 0 | 0  | 0 | 0 | 0  | 0 | 1   | 0   | 0   | 0   | 0  | 1   | 0   |
| n°3            | 1  | 0 | 0 | 0 | 1  | 0   | 0  | 1   | 0   | 0  | 1   | 0  | 1 | 0   | 0 | 0  | 0 | 0 | 1  | 0 | 0   | 1   | 0   | 1   | 0  | 1   | 1   |
| n°5            | 1  | 0 | 0 | 0 | 0  | 0   | 0  | 0   | 0   | 0  | 1   | 0  | 0 | 0   | 0 | 0  | 0 | 0 | 0  | 0 | 0   | 0   | 1   | 0   | 0  | 0   | 0   |
| n°6            | 1  | 0 | 1 | 0 | 0  | 0   | 0  | 0   | 0   | 1  | 1   | 0  | 0 | 0   | 1 | 0  | 0 | 1 | 1  | 1 | 1   | 1   | 0   | 1   | 0  | 1   | 1   |
| n°7            | 0  | 0 | 0 | 0 | 0  | 0   | 0  | 0   | 1   | 1  | 1   | 0  | 0 | 0   | 1 | 0  | 0 | 0 | 0  | 0 | 0   | 0   | 0   | 0   | 0  | 0   | 0   |
| n°8            | 1  | 1 | 0 | 0 | 1  | 0   | 0  | 1   | 0   | 0  | 0   | 0  | 0 | 0   | 0 | 0  | 0 | 0 | 0  | 1 | 0   | 0   | 0   | 0   | 0  | 0   | 0   |
| n°9            | 1  | 1 | 0 | 0 | 1  | 0   | 1  | 1   | 1   | 1  | 1   | 0  | 0 | 0   | 0 | 0  | 0 | 0 | 0  | 0 | 1   | 0   | 1   | 1   | 0  | 0   | 0   |
| n°10           | 1  | 0 | 1 | 0 | 0  | 0   | 0  | 0   | 1   | 1  | 1   | 0  | 0 | 0   | 0 | 0  | 1 | 0 | 1  | 0 | 1   | 0   | 0   | 0   | 0  | 1   | 0   |
| n°11           | 0  | 0 | 1 | 0 | 1  | 0   | 0  | 0   | 1   | 1  | 1   | 0  | 0 | 0   | 0 | 0  | 1 | 0 | 0  | 0 | 1   | 1   | 0   | 0   | 0  | 0   | 1   |
| n°14           | 1  | 0 | 0 | 0 | 0  | 0   | 0  | 0   | 0   | 0  | 0   | 0  | 0 | 0   | 0 | 0  | 0 | 0 | 0  | 1 | 0   | 0   | 0   | 0   | 0  | 1   | 0   |
| n°15           | 0  | 0 | 0 | 0 | 0  | 0   | 0  | 0   | 0   | 1  | 0   | 0  | 0 | 0   | 0 | 0  | 0 | 0 | 0  | 0 | 0   | 0   | 1   | 0   | 0  | 0   | 1   |
| n°16           | 0  | 0 | 0 | 0 | 1  | 0   | 0  | 1   | 0   | 1  | 0   | 0  | 0 | 0   | 0 | 0  | 0 | 0 | 0  | 0 | 0   | 0   | 0   | 1   | 0  | 0   | 0   |
| n°17           | 0  | 0 | 0 | 0 | 0  | 0   | 0  | 0   | 0   | 1  | 0   | 0  | 0 | 0   | 1 | 0  | 0 | 1 | 0  | 0 | 1   | 0   | 0   | 0   | 0  | 0   | 0   |
| n°18           | 1  | 0 | 0 | 0 | 0  | 0   | 0  | 0   | 1   | 0  | 0   | 0  | 0 | 0   | 0 | 0  | 0 | 0 | 0  | 1 | 0   | 0   | 0   | 0   | 0  | 0   | 0   |
| n°19           | 0  | 0 | 0 | 0 | 0  | 0   | 0  | 0   | 0   | 0  | 0   | 0  | 0 | 0   | 0 | 0  | 1 | 1 | 1  | 0 | 0   | 1   | 1   | 0   | 0  | 0   | 0   |
| n°20           | 1  | 0 | 1 | 0 | 0  | 0   | 0  | 0   | 0   | 1  | 0   | 0  | 0 | 0   | 0 | 0  | 1 | 0 | 0  | 0 | 0   | 0   | 0   | 0   | 0  | 1   | 1   |
| n°21           | 0  | 0 | 1 | 0 | 0  | 0   | 0  | 0   | 0   | 0  | 0   | 0  | 0 | 0   | 0 | 0  | 0 | 0 | 0  | 0 | 0   | 0   | 0   | 0   | 0  | 0   | 0   |
| n°22           | 1  | 1 | 1 | 0 | 0  | 0   | 0  | 0   | 0   | 1  | 1   | 0  | 0 | 0   | 0 | 0  | 0 | 0 | 0  | 0 | 1   | 1   | 0   | 1   | 0  | 0   | 1   |
| total          | 10 | 3 | 7 | 0 | 6  | 0   | 1  | 5   | 6   | 10 | 9   | 0  | 1 | 0   | 4 | 0  | 5 | 4 | 5  | 4 | 7   | 6   | 5   | 5   | 0  | 7   | 6   |

RH: rolling head; R:retropulsion; G:grimace; B:bruxism; PL: protrusion of lips; RCE: repetitive closure of eyes; ER: eye rolling; JHW: joined hands washing; JHC: joined hands clapping; M: mouthing; SHM: separated hands mouthing; HP: hair pulling; PR: pill rolling; HBN: one hand behind the neck; C: castanets; TF: twisting two or three fingers; F: flapping; S: sevilla; HG: hand gaze; T: tapping; MHM: mixed midline hand movements; RFM: repetitive finger movements; CAM: complex arm movement; HBH: hand behind head; HT: hair twirling; OBS: oro-buccal stereotypies; EPP: eyes pressing or poking.

Table S2. Sensory Profile-2 Rough results

| patient | seeking | avoiding | sensitivity | registration | auditory | visual | touch | movement | body position | oral | conduct | social emotion | attentional |
|---------|---------|----------|-------------|--------------|----------|--------|-------|----------|---------------|------|---------|----------------|-------------|
| n° 2    | 26      | 30       | 40          | 41           | 14       | 17     | 11    | 7        | 13            | 18   | 12      | 26             | 15          |
| n° 3    | 24      | 33       | 50          | 51           | 13       | 16     | 22    | 2        | 26            | 27   | 11      | 25             | 24          |
| n° 4    | 49      | 35       | 29          | 36           | 15       | 19     | 13    | 16       | 15            | 19   | 20      | 21             | 26          |
| n° 5    | 27      | 23       | 41          | 36           | 16       | 13     | 17    | 6        | 10            | 21   | 15      | 16             | 17          |
| n° 6    | 48      | 24       | 43          | 30           | 18       | 23     | 26    | 20       | 9             | 37   | 11      | 5              | 7           |
| n° 7    | 41      | 41       | 40          | 33           | 17       | 17     | 15    | 16       | 9             | 15   | 17      | 24             | 25          |
| n° 8    | 37      | 23       | 26          | 29           | 12       | 11     | 18    | 9        | 10            | 21   | 9       | 10             | 15          |
| n° 9    | 25      | 24       | 22          | 31           | 8        | 16     | 11    | 10       | 11            | 15   | 15      | 18             | 10          |
| n° 10   | 28      | 19       | 32          | 62           | 7        | 5      | 12    | 16       | 17            | 21   | 20      | 17             | 33          |
| n° 11   | 56      | 38       | 43          | 58           | 30       | 19     | 29    | 16       | 27            | 40   | 15      | 0              | 27          |
| n° 12   | 25      | 24       | 23          | 22           | 10       | 6      | 10    | 9        | 8             | 12   | 13      | 16             | 14          |
| n° 13   | 25      | 15       | 30          | 32           | 9        | 6      | 6     | 7        | 21            | 22   | 10      | 0              | 21          |
| n° 14   | 53      | 23       | 40          | 48           | 22       | 11     | 21    | 23       | 14            | 21   | 19      | 9              | 28          |
| n° 15   | 61      | 42       | 42          | 45           | 19       | 11     | 28    | 31       | 13            | 19   | 15      | 25             | 35          |
| n° 16   | 62      | 51       | 56          | 57           | 19       | 21     | 40    | 14       | 17            | 29   | 26      | 33             | 41          |
| n° 17   | 23      | 32       | 51          | 45           | 18       | 14     | 11    | 11       | 21            | 26   | 10      | 25             | 19          |
| n° 18   | 30      | 53       | 37          | 57           | 14       | 21     | 26    | 19       | 24            | 11   | 14      | 33             | 27          |
| n° 19   | 20      | 13       | 23          | 34           | 7        | 14     | 10    | 11       | 15            | 9    | 7       | 0              | 11          |
| n° 20   | 26      | 8        | 29          | 29           | 15       | 8      | 17    | 10       | 9             | 29   | 2       | 0              | 10          |
| n° 21   | 16      | 12       | 22          | 24           | 10       | 9      | 9     | 4        | 6             | 14   | 6       | 1              | 16          |

Table S3. Correlations between Sensory Profile 2 and behavioral profile

| Variable          |                | SSS     |          |            |           |              |                   | BPIs          |              |              |             |
|-------------------|----------------|---------|----------|------------|-----------|--------------|-------------------|---------------|--------------|--------------|-------------|
|                   |                |         | number   | frequency  | intensity | interference | global impairment | SIB frequency | SIB severity | AB frequency | AB severity |
| Sensory Profile 2 | seeking        | q       | 0.3386   | 0.3297     | 0.1066    | 0.005450     | 0.1556            | 0.1099        | 0.1643       | 0.2703       | 0.2802      |
|                   |                | p-value | 0.1443   | 0.1558     | 0.6547    | 0.9818       | 0.5124            | 0.6445        | 0.4889       | 0.2490       | 0.2315      |
|                   | avoiding       | q       | 0.2645   | 0.2467     | 0.02561   | -0.1395      | 0.07249           | -0.08321      | -0.006868    | 0.1697       | 0.2426      |
|                   |                | p-value | 0.2598   | 0.2944     | 0.9147    | 0.5574       | 0.7614            | 0.7273        | 0.9771       | 0.4746       | 0.3027      |
|                   | sensitivity    | q       | 0.5180 * | 0.3675     | 0.4827 *  | 0.2787       | 0.3374            | 0.2908        | 0.3712       | 0.2319       | 0.2414      |
|                   |                | p-value | 0.01930  | 0.1109     | 0.03109   | 0.2342       | 0.1457            | 0.2135        | 0.1071       | 0.3253       | 0.3052      |
|                   | registration   | q       | 0.1471   | 0.6449 **  | 0.4049    | 0.2020       | 0.04081           | 0.2141        | 0.3810       | 0.1089       | 0.1037      |
|                   |                | p-value | 0.5361   | 0.002139   | 0.07659   | 0.3932       | 0.8644            | 0.3647        | 0.09747      | 0.6477       | 0.6636      |
|                   | auditory       | q       | 0.4432   | 0.2594     | 0.2457    | 0.1145       | 0.5845 **         | 0.2971        | 0.3530       | 0.1724       | 0.2050      |
|                   |                | p-value | 0.05031  | 0.2694     | 0.2965    | 0.6308       | 0.006802          | 0.2034        | 0.1268       | 0.4675       | 0.3859      |
|                   | visual         | q       | 0.3442   | 0.1093     | 0.1029    | -0.1665      | 0.1258            | -0.2226       | -0.1970      | 0.1892       | 0.2123      |
|                   |                | p-value | 0.1372   | 0.6466     | 0.6658    | 0.4828       | 0.5972            | 0.3456        | 0.4051       | 0.4244       | 0.3689      |
|                   | touch          | q       | 0.4877 * | 0.3795     | 0.2061    | -0.01792     | 0.2798            | 0.1270        | 0.1583       | 0.2608       | 0.2836      |
|                   |                | p-value | 0.02915  | 0.09889    | 0.3834    | 0.9402       | 0.2321            | 0.5936        | 0.5051       | 0.2667       | 0.2255      |
|                   | movement       | q       | -0.08556 | 0.3625     | 0.1942    | 0.1898       | 0.1932            | 0.03563       | 0.1251       | 0.08421      | -0.005304   |
|                   |                | p-value | 0.7199   | 0.1162     | 0.4119    | 0.4227       | 0.4144            | 0.8814        | 0.5994       | 0.7241       | 0.9823      |
|                   | body position  | q       | -0.06614 | 0.3910     | 0.3168    | 0.1517       | -0.1331           | 0.06924       | 0.2069       | -0.1333      | -0.1063     |
|                   |                | p-value | 0.7817   | 0.08824    | 0.1735    | 0.5233       | 0.5760            | 0.7718        | 0.3815       | 0.5752       | 0.6556      |
|                   | oral           | q       | 0.3387   | 0.1582     | 0.3203    | 0.2835       | 0.1738            | 0.2493        | 0.2515       | 0.2019       | 0.1668      |
|                   |                | p-value | 0.1440   | 0.5052     | 0.1686    | 0.2258       | 0.4636            | 0.2891        | 0.2847       | 0.3932       | 0.4821      |
|                   | conduct        | q       | 0.001677 | 0.2810     | -0.1069   | -0.03553     | -0.1816           | 0.003410      | 0.1319       | 0.09510      | 0.06404     |
|                   |                | p-value | 0.9944   | 0.2301     | 0.6537    | 0.8818       | 0.4436            | 0.9886        | 0.5794       | 0.6900       | 0.7885      |
|                   | social emotion | q       | 0.1393   | 0.1618     | -0.02183  | -0.07271     | -0.04100          | -0.05349      | 0.006506     | 0.008103     | 0.09310     |
|                   |                | p-value | 0.5579   | 0.4957     | 0.9272    | 0.7606       | 0.8637            | 0.8228        | 0.9783       | 0.9730       | 0.6962      |
|                   | attentional    | q       | 0.1955   | 0.6850 *** | 0.1789    | 0.2630       | -0.01039          | 0.3420        | 0.4814 *     | 0.1697       | 0.1857      |
|                   |                | p-value | 0.4089   | 8.597e -4  | 0.4504    | 0.2627       | 0.9653            | 0.1399        | 0.03164      | 0.4743       | 0.4331      |

\*  $p < 0.05$ . \*\*  $p < 0.01$ . \*\*\*  $p < 0.001$ .

Table S4. Correlations between Adaptive and Sensory Profile

| Variable    |               | Sensory Profile 2 |          |             |              |          |         |         |          |               |         |          |        |         |             |        |         |
|-------------|---------------|-------------------|----------|-------------|--------------|----------|---------|---------|----------|---------------|---------|----------|--------|---------|-------------|--------|---------|
|             |               | seeking           | avoiding | sensitivity | registration | auditory | visual  | touch   | movement | body position | oral    | conduct  | social | emotion | attentional |        |         |
| Vineland-II | Communication | q                 | -0.03228 | 0.1382      | -0.3102      | -0.5215  | *       | -0.2080 | 0.1546   | -0.1434       | -0.1779 | -0.5460  | *      | -0.2101 | 0.07537     | 0.1515 | -0.4906 |
|             |               | p-value           | 0.9055   | 0.6098      | 0.2422       | 0.03831  | 0.4395  | 0.5676  | 0.5963   | 0.5097        | 0.02868 | 0.4347   | 0.7814 | 0.5753  | 0.05366     |        |         |
|             | Daily Living  | q                 | 0.03901  | 0.1220      | -0.2324      | -0.3005  | -0.2210 | 0.08470 | -0.06984 | -0.07819      | -0.3906 | -0.06185 | 0.2310 | 0.06376 | -0.3798     |        |         |
|             |               | p-value           | 0.8860   | 0.6527      | 0.3864       | 0.2582   | 0.4107  | 0.7551  | 0.7972   | 0.7735        | 0.1346  | 0.8200   | 0.3894 | 0.8145  | 0.1468      |        |         |
|             | Sociality     | q                 | 0.04230  | 0.1205      | -0.2489      | -0.2942  | -0.2286 | 0.07092 | -0.07071 | -0.1003       | -0.3812 | -0.07739 | 0.2295 | 0.07528 | -0.3557     |        |         |
|             |               | p-value           | 0.8764   | 0.6567      | 0.3526       | 0.2687   | 0.3945  | 0.7941  | 0.7947   | 0.7118        | 0.1451  | 0.7758   | 0.3924 | 0.7817  | 0.1763      |        |         |

\*  $p < 0.05$ .

Table S5. Correlations between Stereotypy Severity Scale, Problem Behavior Inventory – short version and Sleep Disturbance Scale for Children

| Variable                                      |       | Stereotypy Severity Scale |           |           |              |        |        |       | Problem Behavior Inventory – short version |         |        |        |  |
|-----------------------------------------------|-------|---------------------------|-----------|-----------|--------------|--------|--------|-------|--------------------------------------------|---------|--------|--------|--|
|                                               |       | number                    | frequency | intensity | interference | global | SSS    | SIB   | SIB                                        | AB      | AB     |        |  |
| Sleep<br>Disturbance<br>Scale for<br>Children | DIMS  | q                         | 0.077     | 0.330     | 0.401        | 0.321  | 0.433  | 0.182 | 0.649**                                    | 0.537*  | -0.085 | -0.043 |  |
|                                               |       | p-value                   | 0.747     | 0.155     | 0.080        | 0.168  | 0.056  | 0.443 | 0.002                                      | 0.015   | 0.723  | 0.858  |  |
|                                               | SBD   | q                         | 0.311     | 0.608**   | 0.679***     | 0.470* | 0.462* | 0.109 | 0.612**                                    | 0.540*  | 0.276  | 0.234  |  |
|                                               |       | p-value                   | 0.182     | 0.004     | 0.001        | 0.036  | 0.040  | 0.647 | 0.004                                      | 0.014   | 0.239  | 0.320  |  |
|                                               | DA    | q                         | -0.130    | 0.514*    | 0.589**      | 0.460* | 0.365  | 0.409 | 0.544*                                     | 0.605** | -0.134 | -0.193 |  |
|                                               |       | p-value                   | 0.586     | 0.020     | 0.006        | 0.041  | 0.114  | 0.074 | 0.013                                      | 0.005   | 0.573  | 0.416  |  |
|                                               | SWTD  | q                         | 0.066     | 0.356     | 0.194        | 0.071  | 0.342  | 0.287 | 0.190                                      | 0.365   | -0.041 | -0.097 |  |
|                                               |       | p-value                   | 0.782     | 0.123     | 0.413        | 0.766  | 0.140  | 0.221 | 0.423                                      | 0.113   | 0.865  | 0.683  |  |
|                                               | DOES  | q                         | -0.102    | 0.034     | 0.326        | 0.226  | 0.195  | 0.414 | 0.229                                      | 0.275   | -0.174 | -0.194 |  |
|                                               |       | p-value                   | 0.669     | 0.888     | 0.161        | 0.338  | 0.410  | 0.069 | 0.332                                      | 0.241   | 0.464  | 0.413  |  |
|                                               | SHY   | q                         | -0.163    | -0.262    | -0.123       | -0.143 | -0.094 | 0.082 | -0.169                                     | -0.243  | -0.112 | -0.163 |  |
|                                               |       | p-value                   | 0.493     | 0.264     | 0.607        | 0.548  | 0.694  | 0.731 | 0.475                                      | 0.301   | 0.637  | 0.491  |  |
|                                               | TOTAL | q                         | 0.001     | 0.368     | 0.400        | 0.215  | 0.354  | 0.414 | 0.467*                                     | 0.467*  | -0.089 | -0.084 |  |
|                                               |       | p-value                   | 0.997     | 0.111     | 0.081        | 0.362  | 0.126  | 0.070 | 0.038                                      | 0.038   | 0.709  | 0.726  |  |

\*  $p < 0.05$ . \*\*  $p < 0.01$ . \*\*\* $p < 0.001$ .

**Table S6. Correlations between Sensory Profile 2 and Sleep Disturbance Scale for Children**

| Variable                                      |              | Sensory Profile - 2 |         |          |             |              |          |        |       |          |        |       |         |        |             |
|-----------------------------------------------|--------------|---------------------|---------|----------|-------------|--------------|----------|--------|-------|----------|--------|-------|---------|--------|-------------|
|                                               |              |                     | seeking | avoiding | sensitivity | registration | auditory | visual | touch | movement | body   | oral  | conduct | social | attentional |
| Sleep<br>Disturbance<br>Scale for<br>Children | <b>DIMS</b>  | ρ                   | -0.130  | 0.044    | 0.156       | 0.202        | 0.172    | -0.081 | 0.043 | -0.113   | 0.034  | 0.047 | -0.051  | 0.216  | 0.084       |
|                                               |              | p-value             | 0.586   | 0.854    | 0.511       | 0.393        | 0.468    | 0.734  | 0.858 | 0.636    | 0.885  | 0.844 | 0.831   | 0.360  | 0.724       |
|                                               | <b>SBD</b>   | ρ                   | -0.005  | -0.054   | 0.293       | 0.329        | 0.179    | -0.058 | 0.169 | -0.083   | 0.050  | 0.230 | -0.025  | 0.006  | 0.143       |
|                                               |              | p-value             | 0.983   | 0.820    | 0.209       | 0.157        | 0.451    | 0.807  | 0.475 | 0.728    | 0.836  | 0.330 | 0.917   | 0.979  | 0.548       |
|                                               | <b>DA</b>    | ρ                   | 0.197   | -0.056   | 0.239       | 0.512 *      | 0.242    | -0.304 | 0.208 | 0.376    | 0.447* | 0.244 | 0.098   | -0.223 | 0.429       |
|                                               |              | p-value             | 0.405   | 0.813    | 0.310       | 0.021        | 0.305    | 0.193  | 0.378 | 0.103    | 0.048  | 0.299 | 0.681   | 0.344  | 0.059       |
|                                               | <b>SWTD</b>  | ρ                   | 0.074   | 0.048    | 0.201       | 0.480*       | 0.073    | -0.068 | 0.194 | 0.270    | 0.372  | 0.018 | 0.163   | 0.028  | 0.336       |
|                                               |              | p-value             | 0.758   | 0.840    | 0.395       | 0.032        | 0.759    | 0.776  | 0.413 | 0.250    | 0.106  | 0.939 | 0.492   | 0.905  | 0.148       |
|                                               | <b>DOES</b>  | ρ                   | -0.064  | -0.169   | 0.376       | 0.349        | 0.280    | -0.194 | 0.058 | -0.055   | 0.199  | 0.331 | 0.070   | -0.120 | 0.094       |
|                                               |              | p-value             | 0.788   | 0.476    | 0.102       | 0.132        | 0.232    | 0.412  | 0.807 | 0.819    | 0.401  | 0.155 | 0.769   | 0.614  | 0.695       |
|                                               | <b>SHY</b>   | ρ                   | 0.018   | -0.299   | -0.283      | -0.183       | -0.247   | -0.029 | -     | -0.110   | -0.285 | 0.086 | 0.116   | -0.055 | -0.380      |
|                                               |              | p-value             | 0.939   | 0.201    | 0.226       | 0.439        | 0.294    | 0.903  | 0.668 | 0.644    | 0.223  | 0.719 | 0.627   | 0.818  | 0.098       |
|                                               | <b>TOTAL</b> | ρ                   | 0.028   | -0.128   | 0.194       | 0.473*       | 0.164    | -0.242 | 0.156 | 0.074    | 0.237  | 0.185 | 0.101   | 0.017  | 0.230       |
|                                               |              | p-value             | 0.908   | 0.590    | 0.413       | 0.035        | 0.489    | 0.305  | 0.511 | 0.757    | 0.314  | 0.435 | 0.673   | 0.944  | 0.330       |

\*  $p < 0.05$ .
